# Supplementary material for: Rounding Out the Understanding of ACD Toxicity with the Discovery of Cyclic Forms of Actin Oligomers
Source: MDPI journal article supplement (doi:10.3390/ijms22020718), 2021-01-13
Supplement: s1 [file s1]

## **Supplementary Information for**

# **Rounding out the understanding of ACD toxicity with the discovery of cyclic forms of actin oligomers**

Harper Smith, David B. Heisler, Nick Pinkerton, Elena Kudryashova, Aaron R. Hall, Kelly R. Karch, Andrew Norris, Vicki Wysocki, Marcos Sotomayor, Emil Reisler, Dimitrios Vavylonis, and Dmitri S. Kudryashov

- Supplementary Figures S1-S3
- Supplementary Table S1
- Supplementary Movie Legends

## Supplementary Figure S1

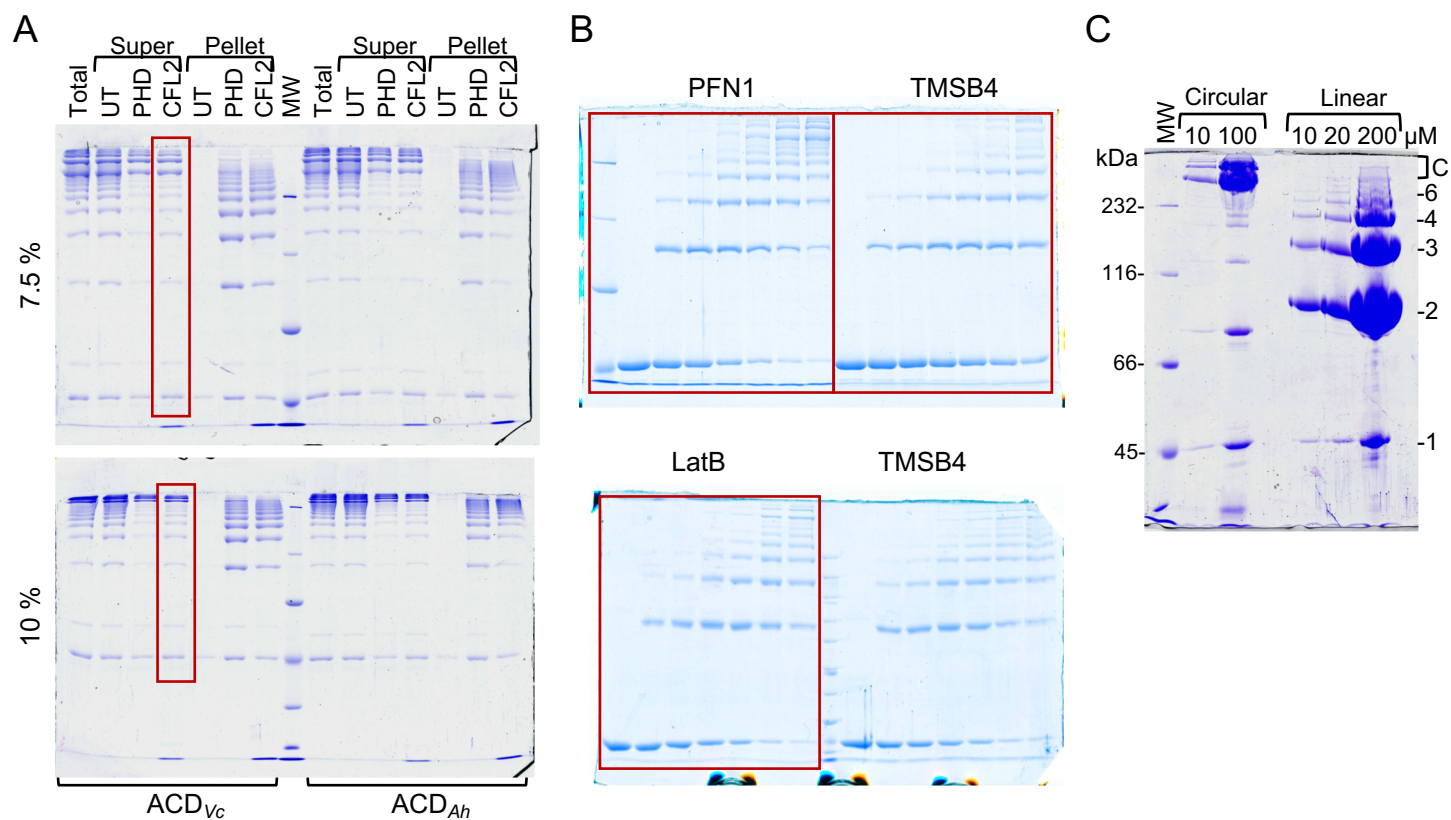

**Figure S1. Full-size uncropped gel images.**

Boxed areas from (A) and (B) are shown and described in Figures 1B and 5E, respectively.

(C) Representative gel image of circular and linear ACD-cross-linked actin oligomers used in actin pyrene assays presented in Figure 4.

## Supplementary Figure S2

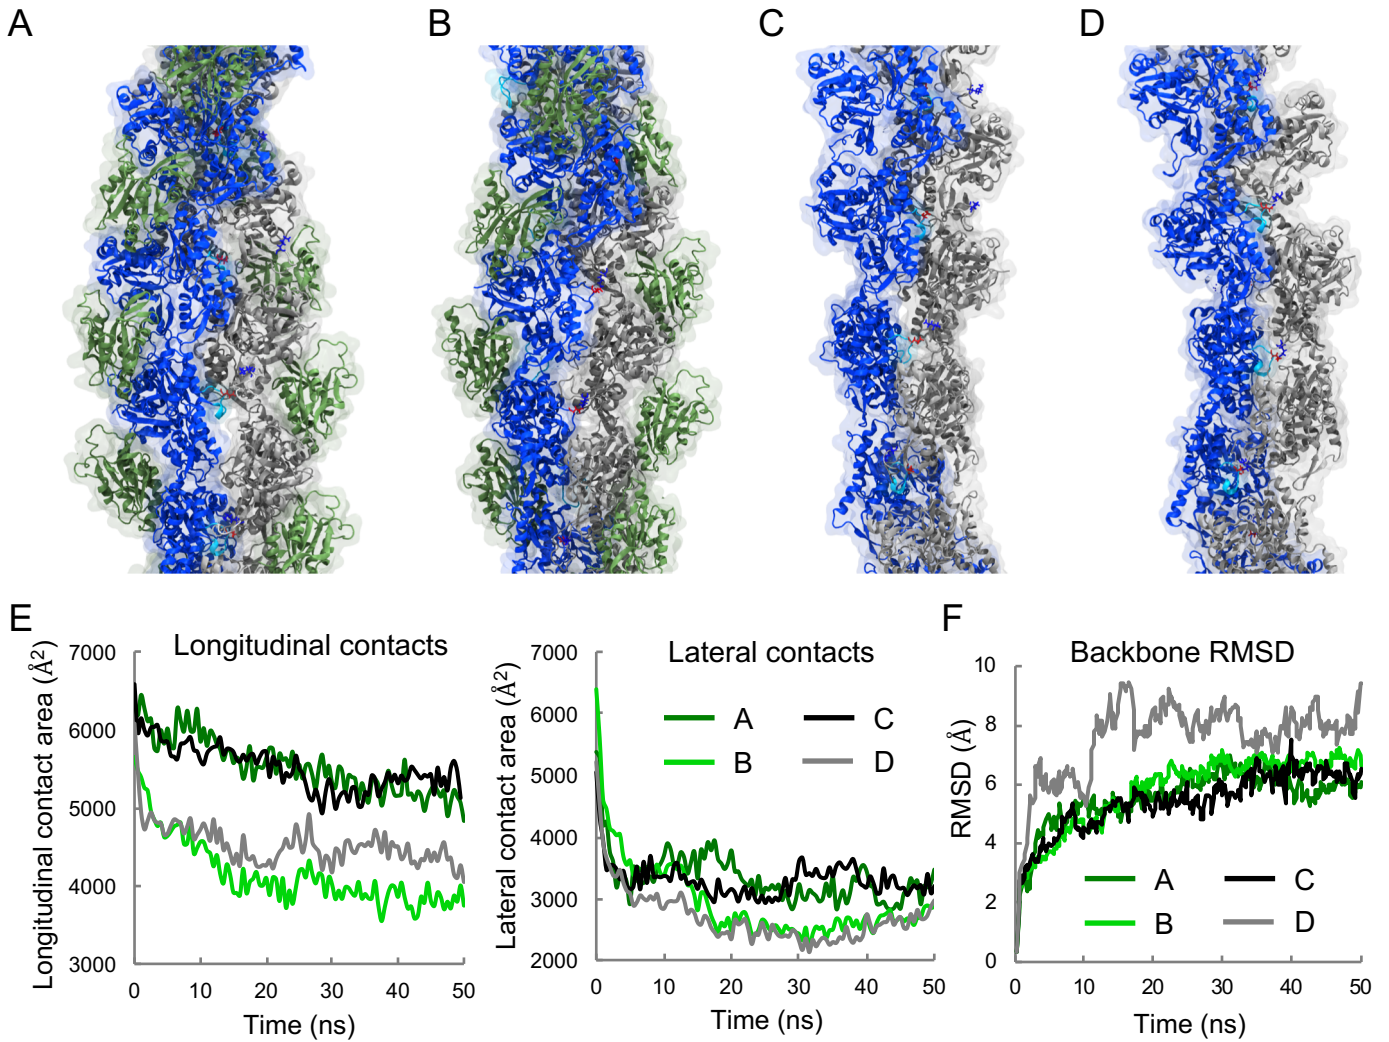

### Figure S2. Equilibrations of targeting-derived structures.

Initial structures for 50-ns equilibrations were built from cofilin-actin (cofilactin; PDB: 6VAO). In all cases, coloring is the same as in Figure 3 in the main text: actin subunits are in grey and blue, D-loop (light gray), hydrophobic plug (cyan), K50 (blue sticks), E270 (red sticks), cofilin is in green. (A-D) The post-equilibration structures are shown for cofilactin (A), cofilactin built by alignment with post-targeting ACD-crosslinked dimer (B), cofilactin with cofilins removed (C); and cofilactin with cofilins removed and actins replaced by AO dimers (D). Contact surfaces (E) for structures shown on A-D were calculated by PyContact between each longitudinal pair of protomers and summed (left) and between strands of the filament (right). Backbone RMSDs (F) of the most stable residues in actin for structures shown on A-D were calculated as described in Methods.

## Supplementary Figure S3

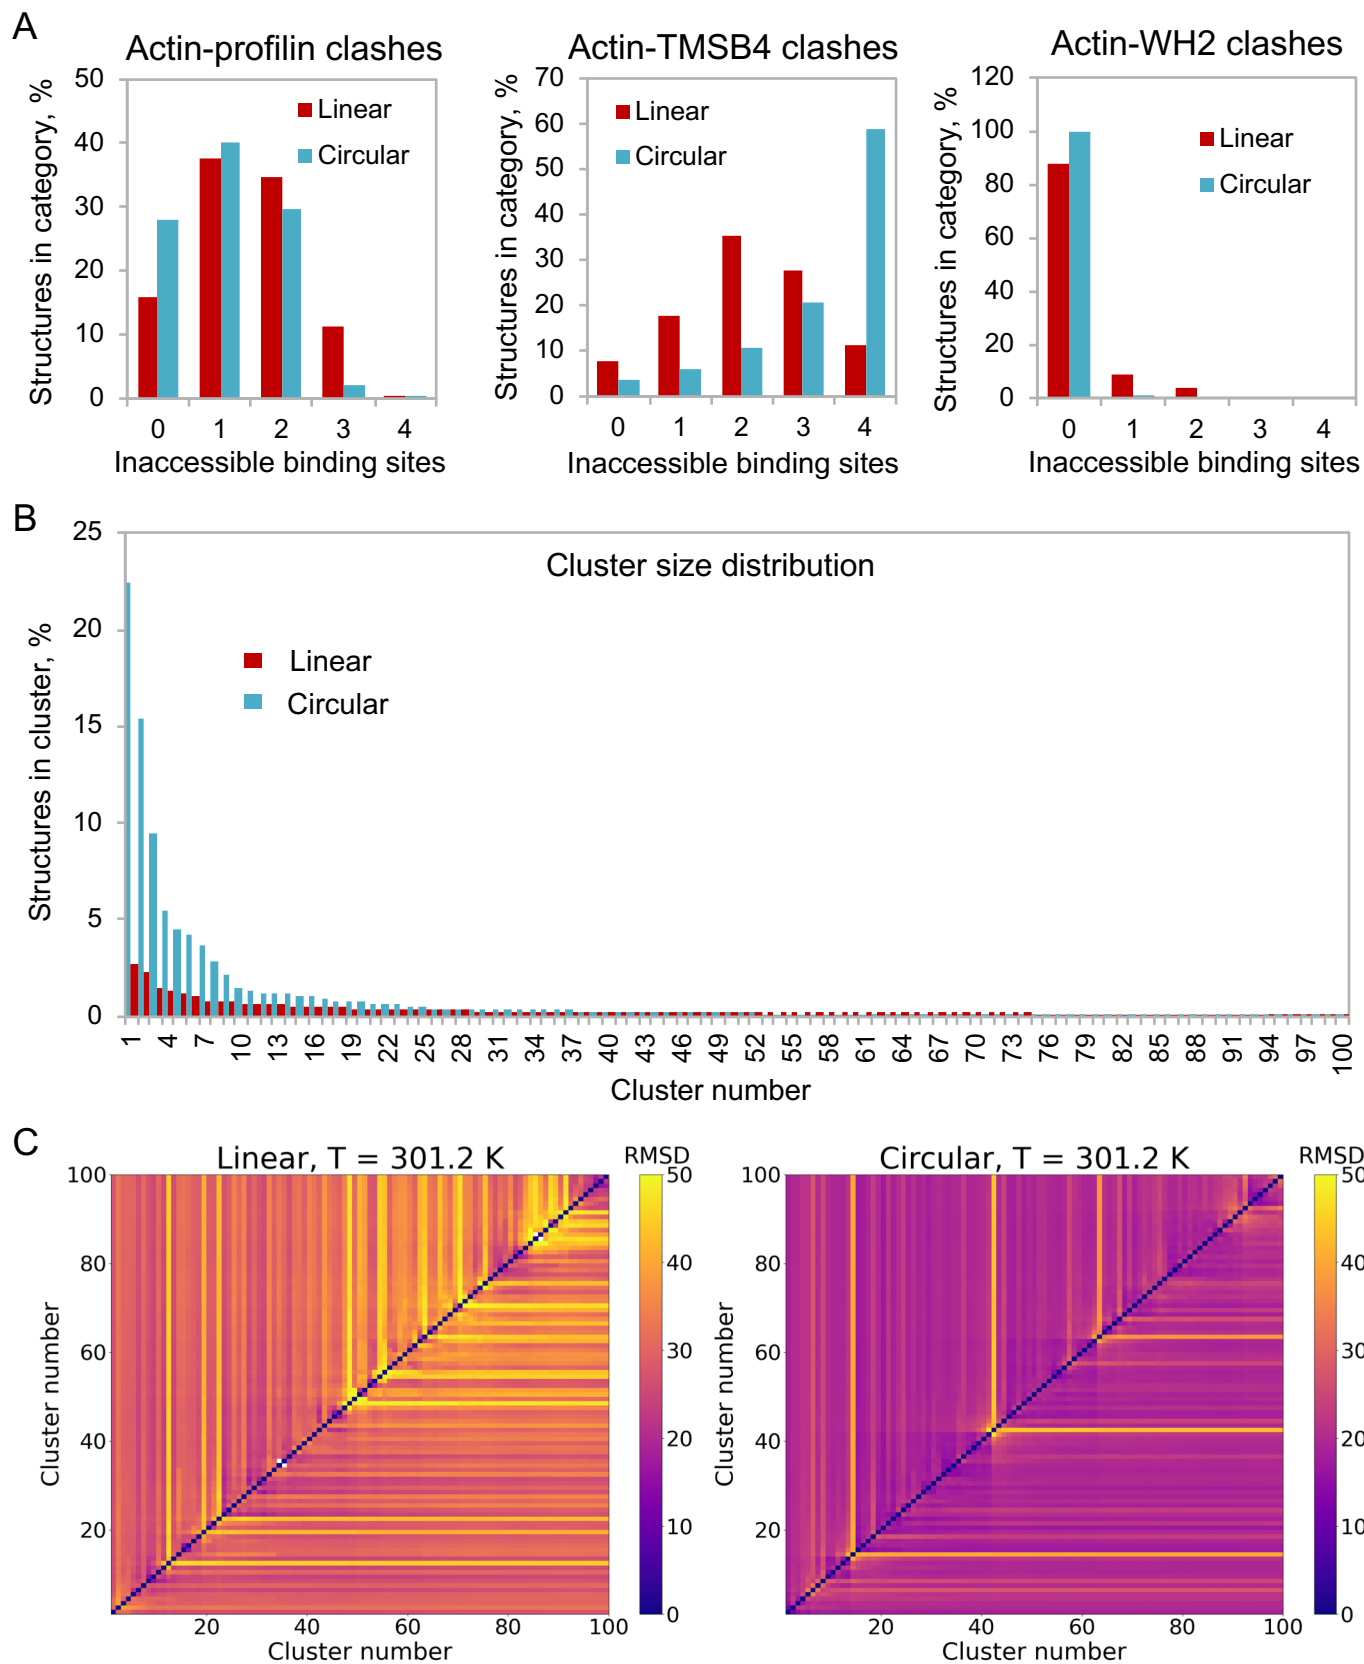

**Figure S3. Binding site accessibility and clustering analysis of coarse-grained KH simulations.**

(A) Histograms of inaccessible binding sites for actin-profilin (left), actin-TMSB4 (middle), and actin-WH2 (right). Percentages are out of 10,000 frames at temperature  $T = 301.2$  K. For circular and linear AOs, clusters determined by the quality threshold clustering algorithm are shown according to cluster size (B) and average cluster-cluster RMSD (C). Since the circular AOs produce larger clusters (B) and lower RMSDs between clusters (C) compared to linear AOs, they explore a smaller configurational space in our simulations. Only the top 100 clusters are shown, which contain 98.24 and 36.68% of frames for cyclic and linear AOs, respectively. The maximum RMSD cutoff for any two cluster members was set at 13.0 Å. Clusters corresponding to the initial configuration were not considered and, therefore, are not shown.

# Supplementary Table S1

| Protein  | Expected mass (Da) | Untreated oligomers (circular and linear) |            | Circular (enriched by CFL2 pelleting) |            | Circular (enriched by PHD pelleting) |            |
|----------|--------------------|-------------------------------------------|------------|---------------------------------------|------------|--------------------------------------|------------|
|          |                    | Observed mass                             | $\Delta m$ | Observed mass                         | $\Delta m$ | Observed mass                        | $\Delta m$ |
| CFL2     | 16917              | 18210                                     | 1293       | 18210                                 | 1293       | -                                    | -          |
| ACD      | 54427              | 53940                                     | 487        | 53940                                 | 487        | 53940                                | 487        |
| dimer    | 83633              | 84970                                     | 1337       | 84920                                 | 1287       | 86280                                | 1310       |
| trimer   | 125450             | 127470                                    | 2020       | 127490                                | 2040       | -                                    | -          |
| tetramer | 167267             | 169840                                    | 2573       | 169770                                | 2503       | 169780                               | 2513       |
| pentamer | 209084             | 212330                                    | 3247       | 212300                                | 3217       | 212330                               | 3247       |
| hexamer  | 250900             | 254920                                    | 4020       | 254850                                | 3950       | 254800                               | 3900       |
| heptamer | 292717             | 297380                                    | 4663       | -                                     | -          | 297170                               | 4453       |
| octamer  | 334534             | 339920                                    | 5386       | -                                     | -          | -                                    | -          |
| nonamer  | 376350             | 382420                                    | 6070       | -                                     | -          | -                                    | -          |

**Table S1. Expected and observed masses of proteins detected in native mass spectrometry experiments.**

The expected masses were calculated based on the protein sequences. The observed masses calculated using UniDec are 1-4 kDa larger than the expected masses ( $\Delta m$ ), most likely due to ATP binding (in case of actin; 507 Da per ATP molecule), salt adducts and/or incomplete desolvation of the complexes.

## Supplementary Movie Legends

### **Supplementary Movie S1. Targeting of ACD-cross-linked dimer to phalloidin-actin.**

25-frame/second simulations described in Figure 3B. Each frame corresponds to 0.2 ns. The target structure is transparent and the purple/cyan protomers are extracted from PDB: 3CJC while the green protomer is from phalloidin-actin (PDB: 6T1Y).

### **Supplementary Movie S2. Targeting of ACD-cross-linked dimer to cofilin-actin.**

25-frame/second simulations described in Figure 3C. Each frame corresponds to 0.2 ns. The target structure is transparent and the purple/cyan protomers are extracted from PDB: 3CJC while the green protomer is from cofilin-actin (PDB: 6VAO).
